# Supplementary material for: A large scale survey of trace metal levels in coastal waters of the Western Mediterranean basin using caged mussels (Mytilus galloprovincialis)
Source: Royal Society of Chemistry journal article supplement (doi:10.1039/c0em00725k), 2011-01-01

### Supplementary material

#### **A large scale survey of trace metal levels in coastal waters of the Western Mediterranean basin using caged mussels (*Mytilus galloprovincialis*)**

José Benedicto<sup>a</sup>, Bruno Andral<sup>b</sup>, Concepción Martínez-Gómez<sup>a</sup>, Carlos Guitart<sup>a\*</sup>,  
Salud Deudero<sup>a,c</sup>, Alessandro Cento<sup>d</sup>, Alfonso Scarpato<sup>e</sup>, Josep Caixach<sup>f</sup>, Samir  
Benbrahim<sup>g</sup>, Lassaad Chouba<sup>h</sup>, Mostefa Boulahdid<sup>i</sup>, François Galgani<sup>b</sup>

<sup>a</sup> IEO, Instituto Español de Oceanografía, Centro Oceanográfico de Murcia, c/Varadero  
1, 30740 San Pedro del Pinatar, Murcia, Spain

<sup>b</sup> IFREMER, Laboratoire Environment Resource Provence Azur Corse, BP 330, 83507  
La Seyne sur Mer Cedex, France

<sup>c</sup> Laboratorio de Biología Marina and GOI-IMEDEA (CSIC-UIB), Guillén Colom,  
Campus Universitari, Ctra. de Valldemossa, km 7.5, 07122 Palma de Mallorca, Spain

<sup>d</sup> Parco Scientifico e Tecnologico della Sicilia (PSTS), Z.I. Blocco Palma, s.s. G.  
Agnelli Angolo, 95030 Catania, Sicilia, Italy

<sup>e</sup> Istituto Superiore per la Protezione e la Ricerca Ambientale ISPRA (ex ICRAM), Via  
di Casalotti 300, 00166 Rome, Italy

<sup>f</sup> Instituto de Diagnóstico Ambiental y Estudios del Agua IDAEA-CSIC, c/Jordi Girona  
18-26, 08034 Barcelona, Spain

<sup>g</sup> Institut National de Recherche Halieutique (INRH), 2 rue de Tiznit, Casablanca 04,  
Morocco

<sup>h</sup> Institut National des Sciences et Technologies de la Mer (INSTM), 28, rue du 2 mars  
1934, 2025 Salammbô, Tunisie

Supplementary Material (ESI) for Journal of Environmental Monitoring  
This journal is © The Royal Society of Chemistry 2011

<sup>i</sup> Institut National des Sciences de la Mer et des l'Aménagement du littoral (ISMAL),

Bois des cars, BP 19, 16320, Alger, Algeria

Keywords: *Trace metals, caged mussel, linear regression model, condition index,  
Western Mediterranean, active biomonitoring*

Number of pages: 13

Number of Tables: 1

Number of Figures: 3

Abbreviations used in tables:

Long DEC= Longitude in decimal coordinates

Lat DEC= Latitude in decimal coordinates

CI= Condition Index

Table S1. Geographic position and bottom depth (m) of sampling sites along the Western Mediterranean region, condition index (CI) and raw and adjusted trace metals levels (mg kg<sup>-1</sup> d.w.) in caged mussel samples. Western Mediterranean sub-basins I= Alborán, II= North-Western, III= South-Western, IV= Tyrrhenian.

| Facade        | Sub-basin | Code | Sites             | Depth | Long DEC | Lat DEC | CI   | Raw concentrations |      |      |     | Adjusted concentrations |      |     |
|---------------|-----------|------|-------------------|-------|----------|---------|------|--------------------|------|------|-----|-------------------------|------|-----|
|               |           |      |                   |       |          |         |      | Pb                 | Cd   | Hg   | Ni  | Cd                      | Hg   | Ni  |
| France (2004) | II        | 0    | Thau lagoon       | 7.0   | 3.5639   | 43.3729 | 0.12 | 1.3                | 1.00 | 0.09 | 0.7 | -                       | -    | -   |
| France (2005) | II        | 0    | Thau lagoon       | 7.0   | 3.5639   | 43.3729 | 0.06 | 1.7                | 1.17 | 0.15 | 1.0 | -                       | -    | -   |
| France (2006) | II        | 0    | Thau lagoon       | 7.0   | 3.5639   | 43.3729 | 0.15 | 0.7                | 0.60 | 0.07 | 0.4 | -                       | -    | -   |
| Spain         | I         | 1    | Algeciras         | 17.0  | -5.4325  | 36.1565 | 0.18 | 0.9                | 0.58 | 0.05 | 0.6 | 1.18                    | 0.09 | 0.8 |
| Spain         | I         | 2    | Marbella          | 30.5  | -4.9700  | 36.4494 | 0.19 | 0.5                | 0.88 | 0.04 | 0.9 | 1.51                    | 0.08 | 1.1 |
| Spain         | I         | 3    | Fuengirola        | 20.0  | -4.6006  | 36.5500 | 0.14 | 0.9                | 1.05 | 0.06 | 1.0 | 1.47                    | 0.09 | 1.2 |
| Spain         | I         | 4    | Málaga            | 31.0  | -4.3461  | 36.7066 | 0.18 | 0.7                | 0.95 | 0.05 | 0.6 | 1.53                    | 0.09 | 0.8 |
| Spain         | I         | 5    | Torrox            | 30.0  | -3.9622  | 36.7165 | 0.14 | 0.7                | 1.21 | 0.07 | 0.7 | 1.58                    | 0.09 | 0.8 |
| Spain         | I         | 6    | Adra              | 30.5  | -3.0037  | 36.7305 | 0.19 | 1.0                | 1.38 | 0.05 | 0.8 | 1.99                    | 0.09 | 1.0 |
| Spain         | I         | 7    | Almería           | 29.7  | -2.4251  | 36.8008 | 0.15 | 1.3                | 1.23 | 0.05 | 0.7 | 1.66                    | 0.08 | 0.9 |
| Spain         | I         | 8    | Cabo de Gata      | 31.0  | -2.1975  | 36.7076 | 0.17 | 1.1                | 1.24 | 0.04 | 0.6 | 1.80                    | 0.08 | 0.8 |
| Spain         | I         | 9    | Águilas           | 31.5  | -1.5971  | 37.3845 | 0.13 | 1.7                | 1.81 | 0.07 | 0.7 | 2.11                    | 0.09 | 0.8 |
| Spain         | I         | 10   | El Portús         | 31.0  | -1.0382  | 37.5741 | 0.13 | 6.2                | 1.22 | 0.13 | 0.5 | 1.57                    | 0.15 | 0.6 |
| Spain         | I         | 11   | Cabo del Agua     | 48.5  | -0.9132  | 37.5548 | 0.11 | 6.4                | 1.39 | 0.09 | 0.8 | 1.59                    | 0.10 | 0.9 |
| Spain         | III       | 12   | Portmán           | 44.5  | -0.8543  | 37.5647 | 0.11 | 5.3                | 1.26 | 0.08 | 0.6 | 1.40                    | 0.09 | 0.7 |
| Spain         | III       | 13   | Cabo de Palos     | 29.2  | -0.7815  | 37.5527 | 0.10 | 2.3                | 1.26 | 0.08 | 0.9 | 1.30                    | 0.08 | 0.9 |
| Spain         | III       | 14   | Guardamar         | 26.0  | -0.5972  | 38.1075 | 0.08 | 1.3                | 1.24 | 0.10 | 1.0 | 0.99                    | 0.08 | 0.9 |
| Spain         | II        | 15   | Javea             | 28.7  | 0.2158   | 38.7876 | 0.15 | 1.2                | 0.85 | 0.06 | 1.1 | 1.32                    | 0.09 | 1.3 |
| Balearic I.   | II        | 16   | San Antonio Abad  | 12.0  | 1.2864   | 38.9784 | 0.06 | 1.5                | 2.14 | 0.13 | 1.0 | 1.32                    | 0.08 | 0.7 |
| Balearic I.   | III       | 17   | Formentera island | 21.5  | 1.4714   | 38.7956 | 0.06 | 1.2                | 2.11 | 0.15 | 1.2 | 1.36                    | 0.10 | 0.9 |
| Balearic I.   | III       | 18   | Port Eivissa      | 20.5  | 1.4538   | 38.9006 | 0.06 | 1.5                | 2.04 | 0.11 | 1.0 | 1.25                    | 0.06 | 0.7 |
| Balearic I.   | III       | 19   | Santa Eulalia     | 31.3  | 1.5525   | 38.9711 | 0.07 | 2.1                | 2.09 | 0.11 | 1.1 | 1.62                    | 0.08 | 0.9 |
| Balearic I.   | III       | 20   | Santa Ponsa       | 25.5  | 2.4555   | 39.5156 | 0.06 | 1.4                | 1.97 | 0.13 | 1.0 | 1.28                    | 0.09 | 0.7 |
| Balearic I.   | III       | 21   | Palma de Mallorca | 25.2  | 2.6322   | 39.5441 | 0.10 | 2.3                | 1.02 | 0.11 | 0.6 | 1.10                    | 0.11 | 0.6 |
| Balearic I.   | III       | 22   | Cabrera           | 41.0  | 2.9435   | 39.1552 | 0.05 | 1.6                | 2.58 | 0.13 | 1.6 | 1.56                    | 0.06 | 1.2 |

Supplementary Material (ESI) for Journal of Environmental Monitoring  
 This journal is © The Royal Society of Chemistry 2011

|             |     |    |                     |      |         |         |      |     |      |      |     |      |      |     |
|-------------|-----|----|---------------------|------|---------|---------|------|-----|------|------|-----|------|------|-----|
| Balearic I. | III | 23 | Cala d'Or           | 45.5 | 3.2417  | 39.3572 | 0.06 | 1.2 | 2.15 | 0.12 | 1.0 | 1.34 | 0.07 | 0.7 |
| Balearic I. | III | 24 | Portocolom          | 35.6 | 3.2844  | 39.4194 | 0.07 | 1.0 | 1.95 | 0.12 | 0.9 | 1.47 | 0.09 | 0.7 |
| Balearic I. | II  | 25 | Alcudia             | 26.0 | 3.1856  | 39.7994 | 0.06 | 1.2 | 1.87 | 0.13 | 1.2 | 1.10 | 0.08 | 0.9 |
| Balearic I. | II  | 26 | Soller              | 21.5 | 2.6879  | 39.7976 | 0.07 | 1.5 | 1.87 | 0.11 | 1.0 | 1.27 | 0.07 | 0.8 |
| Balearic I. | II  | 27 | Ciutadella          | 17.5 | 3.8240  | 39.9943 | 0.05 | 1.4 | 2.25 | 0.14 | 1.4 | 1.23 | 0.07 | 1.0 |
| Balearic I. | II  | 28 | Cala Trebeluja      | 21.3 | 3.9862  | 39.9209 | 0.07 | 2.0 | 2.16 | 0.13 | 1.0 | 1.67 | 0.10 | 0.8 |
| Balearic I. | II  | 29 | Mahon               | 33.0 | 4.3125  | 39.8589 | 0.07 | 1.6 | 2.39 | 0.11 | 0.9 | 1.97 | 0.08 | 0.7 |
| Balearic I. | II  | 30 | Fornells            | 30.0 | 4.1125  | 40.0646 | 0.07 | 1.5 | 2.42 | 0.12 | 1.2 | 1.83 | 0.08 | 1.0 |
| Spain       | II  | 31 | Gandia              | 26.5 | -0.0925 | 39.0492 | 0.11 | 1.2 | 1.13 | 0.07 | 1.0 | 1.24 | 0.08 | 1.0 |
| Spain       | II  | 32 | Valencia            | 30.0 | -0.2258 | 39.2706 | 0.10 | 1.2 | 0.95 | 0.08 | 1.0 | 0.97 | 0.08 | 1.0 |
| Spain       | II  | 33 | Columbretes islands | 39.8 | 0.6839  | 39.9003 | 0.10 | 1.3 | 1.39 | 0.08 | 1.2 | 1.45 | 0.08 | 1.2 |
| Spain       | II  | 34 | Ebro river          | 20.4 | 0.9338  | 40.7176 | 0.16 | 1.4 | 0.84 | 0.06 | 0.8 | 1.35 | 0.09 | 1.0 |
| Spain       | II  | 35 | Llobregat river     | 20.5 | 2.2057  | 41.3523 | 0.17 | 2.7 | 0.56 | 0.05 | 0.7 | 1.13 | 0.09 | 0.9 |
| Spain       | II  | 36 | Barcelona           | 50.2 | 2.2437  | 41.4101 | 0.22 | 1.3 | 0.62 | 0.04 | 0.5 | 1.33 | 0.09 | 0.8 |
| Spain       | II  | 37 | Besós river         | 30.2 | 2.7686  | 41.6417 | 0.18 | 1.4 | 0.46 | 0.05 | 0.5 | 1.05 | 0.09 | 0.7 |
| Spain       | II  | 38 | Medas islands       | 30.2 | 3.2195  | 42.0189 | 0.19 | 0.8 | 0.73 | 0.04 | 0.7 | 1.36 | 0.08 | 0.9 |
| Spain       | II  | 39 | Golfo de Rosas      | 25.5 | 3.1483  | 42.1848 | 0.18 | 0.7 | 0.87 | 0.04 | 0.7 | 1.46 | 0.08 | 0.9 |
| Spain       | II  | 40 | Cabo de Creus       | 29.7 | 3.2844  | 42.2781 | 0.18 | 0.9 | 0.73 | 0.04 | 0.7 | 1.31 | 0.08 | 0.9 |
| France      | II  | 41 | Tet river           | 14.8 | 3.0508  | 42.7154 | 0.18 | 0.9 | 0.63 | 0.04 | 0.6 | 1.24 | 0.08 | 0.8 |
| France      | II  | 42 | Aude river          | 11.0 | 3.2503  | 43.2038 | 0.17 | 1.1 | 0.69 | 0.04 | 0.7 | 1.26 | 0.08 | 0.9 |
| France      | II  | 43 | Agde-Hérault river  | 10.7 | 3.4309  | 43.2659 | 0.19 | 1.1 | 0.69 | 0.04 | 0.6 | 1.32 | 0.08 | 0.9 |
| France      | II  | 44 | Frontignan          | 9.7  | 3.7610  | 43.4099 | 0.20 | 0.8 | 0.69 | 0.04 | 0.7 | 1.35 | 0.08 | 1.0 |
| France      | II  | 45 | Montpellier         | 29.8 | 3.9654  | 43.4340 | 0.18 | 0.8 | 0.71 | 0.04 | 0.6 | 1.30 | 0.08 | 0.8 |
| France      | II  | 46 | Rhone river         | 26.0 | 4.8441  | 43.3109 | 0.13 | 1.4 | 0.71 | 0.06 | 1.4 | 1.07 | 0.08 | 1.5 |
| France      | II  | 47 | Huveaune river      | 21.0 | 5.3539  | 43.2540 | 0.18 | 2.1 | 0.60 | 0.08 | 0.5 | 1.20 | 0.12 | 0.7 |
| France      | II  | 48 | Cortiou             | 21.0 | 5.4017  | 43.2116 | 0.13 | 1.5 | 0.90 | 0.07 | 0.7 | 1.20 | 0.09 | 0.8 |
| France      | II  | 49 | Sainte Marguerite   | 41.0 | 5.9947  | 43.0921 | 0.11 | 1.5 | 1.00 | 0.08 | 1.0 | 1.20 | 0.09 | 1.1 |
| France      | II  | 50 | Hyerès river        | 11.1 | 6.2072  | 43.0999 | 0.13 | 1.5 | 1.09 | 0.10 | 0.7 | 1.44 | 0.12 | 0.8 |
| France      | II  | 51 | Argens river        | 21.0 | 6.7432  | 43.4052 | 0.09 | 1.3 | 1.05 | 0.08 | 1.0 | 0.93 | 0.07 | 1.0 |
| France      | II  | 52 | Cannes              | 50.7 | 7.0739  | 43.5465 | 0.10 | 1.3 | 1.39 | 0.09 | 0.9 | 1.37 | 0.09 | 0.9 |
| France      | II  | 53 | Nice                | 64.7 | 7.2674  | 43.6925 | 0.13 | 1.6 | 1.35 | 0.08 | 1.1 | 1.68 | 0.10 | 1.2 |
| Corsica I.  | IV  | 54 | Bastia sud          | 31.0 | 9.5550  | 42.5438 | 0.09 | 1.2 | 1.23 | 0.09 | 1.0 | 1.09 | 0.08 | 0.9 |

Supplementary Material (ESI) for Journal of Environmental Monitoring  
 This journal is © The Royal Society of Chemistry 2011

|            |    |    |                         |      |         |         |      |     |      |      |     |      |      |     |
|------------|----|----|-------------------------|------|---------|---------|------|-----|------|------|-----|------|------|-----|
| Corsica I. | IV | 55 | Golo river              | n.m. | 9.5716  | 42.1258 | 0.10 | 1.0 | 0.89 | 0.08 | 1.0 | 0.91 | 0.08 | 1.0 |
| Corsica I. | IV | 56 | Tavignano               | 21.5 | 9.3348  | 41.6053 | 0.09 | 0.9 | 1.00 | 0.09 | 0.8 | 0.96 | 0.09 | 0.8 |
| Corsica I. | IV | 57 | Porto-vecchio           | 11.0 | 9.2666  | 41.3356 | 0.10 | 1.1 | 1.11 | 0.08 | 0.6 | 1.18 | 0.08 | 0.6 |
| Corsica I. | IV | 58 | Lavezzi island          | 31.0 | 8.8495  | 41.6903 | 0.08 | 1.4 | 1.18 | 0.09 | 0.8 | 0.99 | 0.08 | 0.7 |
| Corsica I. | II | 59 | Propriano               | n.m. | 8.7788  | 41.8676 | 0.09 | 1.1 | 1.12 | 0.10 | 0.8 | 0.96 | 0.09 | 0.7 |
| Corsica I. | II | 60 | Ajaccio sud             | 21.0 | 8.6466  | 42.4420 | 0.11 | 1.1 | 1.05 | 0.08 | 0.6 | 1.22 | 0.09 | 0.7 |
| Corsica I. | II | 61 | Galeria                 | 31.0 | 8.6657  | 42.2903 | 0.10 | 1.1 | 1.20 | 0.08 | 0.8 | 1.24 | 0.08 | 0.8 |
| Corsica I. | II | 62 | Porto                   | n.m. | 9.3206  | 42.8900 | 0.10 | 1.2 | 1.10 | 0.08 | 1.0 | 1.08 | 0.08 | 1.0 |
| Corsica I. | II | 63 | Pino                    | n.m. | 8.0364  | 43.8659 | 0.11 | 1.3 | 1.21 | 0.06 | 1.3 | 1.39 | 0.07 | 1.4 |
| Italy      | II | 64 | Imperia                 | 30.2 | 9.4583  | 42.6726 | 0.13 | 1.0 | 0.87 | 0.07 | 0.6 | 1.16 | 0.09 | 0.7 |
| Italy      | II | 65 | Zinola                  | 31.3 | 8.4597  | 44.2581 | 0.13 | 1.9 | 0.89 | 0.08 | 1.1 | 1.23 | 0.10 | 1.2 |
| Italy      | II | 66 | Haven                   | 74.4 | 8.6988  | 44.3765 | 0.13 | 1.7 | 0.96 | 0.07 | 1.2 | 1.27 | 0.09 | 1.3 |
| Italy      | II | 67 | Cornigliano             | 72.4 | 8.8641  | 44.3859 | 0.13 | 1.6 | 1.12 | 0.06 | 1.5 | 1.48 | 0.08 | 1.6 |
| Italy      | II | 68 | Santa Margherita Ligure | 31.0 | 9.2231  | 44.3241 | 0.13 | 0.8 | 0.99 | 0.07 | 0.9 | 1.35 | 0.09 | 1.0 |
| Italy      | II | 69 | Punta San Pietro        | 30.2 | 9.8077  | 44.0302 | 0.16 | 0.7 | 0.67 | 0.06 | 0.6 | 1.16 | 0.09 | 0.8 |
| Italy      | II | 70 | Forte dei Marmi         | 15.2 | 10.1229 | 43.9339 | 0.18 | 0.6 | 0.68 | 0.04 | 0.5 | 1.29 | 0.08 | 0.7 |
| Italy      | II | 71 | Livorno porto           | 20.2 | 10.2858 | 43.5222 | 0.11 | 0.9 | 1.00 | 0.09 | 1.8 | 1.12 | 0.10 | 1.8 |
| Italy      | IV | 72 | Piombino chiusa         | 23.3 | 10.5466 | 42.9096 | 0.14 | 1.8 | 1.23 | 0.11 | 1.1 | 1.62 | 0.14 | 1.3 |
| Italy      | IV | 73 | Portoferraio            | 31.0 | 10.3149 | 42.8293 | 0.08 | 3.1 | 1.46 | 0.14 | 1.2 | 1.18 | 0.12 | 1.1 |
| Italy      | IV | 74 | Ombrone river           | 15.2 | 11.0636 | 42.6166 | 0.14 | 0.6 | 0.85 | 0.06 | 0.8 | 1.22 | 0.08 | 0.9 |
| Italy      | IV | 75 | San Stefano             | 32.5 | 11.1240 | 42.4516 | 0.13 | 0.9 | 0.95 | 0.09 | 1.2 | 1.27 | 0.11 | 1.3 |
| Italy      | IV | 76 | Giannutri island        | 53.0 | 11.0952 | 42.2490 | 0.08 | 1.0 | 1.54 | 0.11 | 1.1 | 1.21 | 0.09 | 1.0 |
| Italy      | IV | 77 | Montalto di Castro      | 16.0 | 11.5514 | 42.3239 | 0.14 | 0.8 | 0.73 | 0.11 | 0.7 | 1.12 | 0.14 | 0.9 |
| Italy      | IV | 78 | Civitavecchia           | 31.0 | 11.7743 | 42.0959 | 0.12 | 1.3 | 0.86 | 0.10 | 0.7 | 1.12 | 0.12 | 0.8 |
| Italy      | IV | 79 | Tevere river            | 16.0 | 12.2271 | 41.7151 | 0.11 | 1.2 | 0.89 | 0.11 | 0.9 | 1.02 | 0.12 | 1.0 |
| Italy      | IV | 80 | Torpaterno              | 15.5 | 12.4071 | 41.6285 | 0.12 | 1.1 | 0.86 | 0.09 | 0.6 | 1.09 | 0.11 | 0.7 |
| Italy      | IV | 81 | Palmarola island        | 21.0 | 12.8733 | 40.9364 | 0.06 | 1.4 | 2.41 | 0.17 | 1.9 | 1.44 | 0.11 | 1.5 |
| Italy      | IV | 82 | Gaeta                   | 20.0 | 13.5875 | 41.2125 | 0.11 | 1.0 | 1.13 | 0.07 | 0.1 | 1.24 | 0.08 | 0.1 |
| Italy      | IV | 83 | Bagnoli                 | 20.5 | 14.1584 | 40.7990 | 0.09 | 1.8 | 1.30 | 0.10 | 0.8 | 1.23 | 0.10 | 0.8 |
| Italy      | IV | 84 | Napoli                  | 21.0 | 14.2929 | 40.8273 | 0.11 | 1.4 | 1.12 | 0.08 | 0.9 | 1.25 | 0.09 | 1.0 |
| Italy      | IV | 85 | Sarno river             | 20.0 | 13.1634 | 38.7181 | 0.06 | 1.1 | 2.89 | 0.15 | 1.4 | 2.04 | 0.10 | 1.1 |
| Italy      | IV | 86 | Palinuro                | 20.5 | 14.4583 | 40.7230 | 0.09 | 1.2 | 1.20 | 0.08 | 0.8 | 1.12 | 0.07 | 0.8 |

Supplementary Material (ESI) for Journal of Environmental Monitoring  
 This journal is © The Royal Society of Chemistry 2011

|             |     |     |                      |      |         |         |      |     |      |      |     |      |      |     |
|-------------|-----|-----|----------------------|------|---------|---------|------|-----|------|------|-----|------|------|-----|
| Italy       | IV  | 87  | Vibo                 | 21.0 | 15.3228 | 40.0082 | 0.06 | 0.9 | 2.37 | 0.16 | 1.3 | 1.47 | 0.10 | 0.9 |
| Italy       | IV  | 88  | Gioia                | 21.0 | 16.1390 | 38.7288 | 0.07 | 1.0 | 1.95 | 0.12 | 1.3 | 1.42 | 0.09 | 1.1 |
| Sicily I.   | IV  | 89  | Milazzo              | 30.0 | 15.8816 | 38.4369 | 0.07 | 0.9 | 1.37 | 0.15 | 1.1 | 0.86 | 0.12 | 0.9 |
| Sicily I.   | IV  | 90  | Patti                | 40.0 | 15.3096 | 38.2146 | 0.08 | 1.2 | 1.64 | 0.10 | 1.3 | 1.33 | 0.08 | 1.2 |
| Sicily I.   | IV  | 91  | Filicudi island      | 49.0 | 14.9828 | 38.1616 | 0.07 | 0.9 | 1.76 | 0.11 | 1.3 | 1.37 | 0.08 | 1.1 |
| Sicily I.   | IV  | 92  | Termini              | 30.5 | 14.5721 | 38.5560 | 0.06 | 0.9 | 2.48 | 0.14 | 1.3 | 1.86 | 0.10 | 1.1 |
| Sicily I.   | IV  | 93  | Palerme              | 20.5 | 13.7840 | 38.0033 | 0.07 | 0.8 | 1.47 | 0.14 | 1.1 | 1.04 | 0.11 | 0.9 |
| Sicily I.   | IV  | 94  | Ustica island        | 41.0 | 13.3235 | 38.2223 | 0.08 | 0.9 | 1.33 | 0.23 | 1.1 | 1.11 | 0.22 | 1.0 |
| Sicily I.   | IV  | 95  | Trappeto             | 29.5 | 13.0039 | 38.0704 | 0.07 | 0.9 | 1.82 | 0.13 | 1.3 | 1.41 | 0.10 | 1.1 |
| Sicily I.   | IV  | 96  | Trapani2             | 20.7 | 12.4774 | 38.0092 | 0.07 | 0.8 | 1.53 | 0.12 | 1.1 | 1.06 | 0.09 | 0.9 |
| Sicily I.   | IV  | 97  | Trapani              | 21.0 | 12.4096 | 37.9885 | 0.07 | 0.9 | 1.81 | 0.12 | 1.1 | 1.26 | 0.08 | 0.9 |
| Sicily I.   | IV  | 98  | Banco di Pantelleria | 22.5 | 12.0973 | 37.1651 | 0.07 | 1.1 | 1.91 | 0.14 | 1.1 | 1.50 | 0.11 | 0.9 |
| Sardinia I. | III | 99  | Portoscuso           | 20.0 | 8.3609  | 39.2017 | 0.08 | 8.3 | 2.01 | 0.33 | 0.9 | 1.68 | 0.31 | 0.8 |
| Sardinia I. | III | 100 | Oristano             | 20.7 | 8.4641  | 39.8251 | 0.10 | 2.9 | 1.46 | 0.11 | 0.6 | 1.53 | 0.11 | 0.6 |
| Sardinia I. | IV  | 101 | Porto Torres         |      |         |         | 0.08 | 1.9 | 1.98 | 0.14 | 1.7 | 1.65 | 0.12 | 1.6 |
| Sardinia I. | IV  | 102 | Maddalena island     | 22.0 | 9.4376  | 41.1964 | 0.09 | 1.3 | 1.35 | 0.17 | 1.1 | 1.27 | 0.16 | 1.1 |
| Sardinia I. | IV  | 103 | Tavolara island      | 30.5 | 9.6570  | 40.9279 | 0.10 | 0.8 | 1.26 | 0.07 | 0.8 | 1.35 | 0.08 | 0.8 |
| Sardinia I. | IV  | 104 | Cagliari             | 20.5 | 9.1775  | 39.1680 | 0.11 | 1.5 | 1.07 | 0.11 | 0.7 | 1.18 | 0.12 | 0.7 |
| Tunisia     | IV  | 105 | Sidi Daoud           | 21.5 | 10.8664 | 37.0007 | 0.07 | 1.1 | 1.81 | 0.13 | 2.2 | 1.32 | 0.10 | 2.0 |
| Tunisia     | IV  | 106 | Korbous              | 21.5 | 10.5360 | 36.8073 | 0.08 | 1.0 | 1.33 | 0.12 | 2.2 | 0.98 | 0.10 | 2.1 |
| Tunisia     | IV  | 107 | Rades                | 15.0 | 10.4028 | 36.7824 | 0.09 | 1.3 | 1.28 | 0.10 | 1.7 | 1.20 | 0.09 | 1.7 |
| Tunisia     | IV  | 108 | Sidi Ali             | 20.5 | 10.3315 | 37.1754 | 0.08 | 1.0 | 1.62 | 0.12 | 2.0 | 1.31 | 0.10 | 1.9 |
| Tunisia     | IV  | 109 | Bizerte              | 21.5 | 9.9191  | 37.2694 | 0.09 | 1.2 | 1.33 | 0.11 | 1.4 | 1.22 | 0.10 | 1.4 |
| Tunisia     | IV  | 110 | La Galite island     | 20.0 | 8.9521  | 37.5119 | 0.05 | 1.3 | 2.48 | 0.14 | 2.6 | 1.42 | 0.07 | 2.2 |
| Tunisia     | IV  | 111 | Tabarka              | 22.0 | 8.7720  | 36.9686 | 0.07 | 1.2 | 2.04 | 0.14 | 3.4 | 1.53 | 0.11 | 3.2 |
| Algeria     | III | 112 | Annaba               | 22.0 | 7.8206  | 36.8994 | 0.11 | 0.9 | 1.31 | 0.08 | 1.5 | 1.46 | 0.09 | 1.6 |
| Algeria     | III | 113 | Skikda               | 22.0 | 6.9205  | 36.8953 | 0.09 | 0.9 | 1.24 | 0.20 | 2.4 | 1.16 | 0.19 | 2.4 |
| Algeria     | III | 114 | Zhour river          | 21.0 | 6.2437  | 36.9477 | 0.07 | 1.2 | 1.97 | 0.14 | 3.1 | 1.48 | 0.11 | 2.9 |
| Algeria     | III | 115 | Jijel                | 23.5 | 5.8033  | 36.8280 | 0.11 | 0.8 | 1.05 | 0.11 | 0.8 | 1.15 | 0.12 | 0.8 |
| Algeria     | III | 116 | Bejaia               | 21.5 | 5.1328  | 36.7425 | 0.10 | 0.8 | 1.19 | 0.11 | 1.0 | 1.22 | 0.11 | 1.0 |
| Algeria     | III | 117 | Alger 2              | 23.5 | 3.1818  | 36.7650 | 0.14 | 1.4 | 1.05 | 0.12 | 0.9 | 1.43 | 0.14 | 1.0 |
| Algeria     | III | 118 | Alger 1              | 22.0 | 3.1546  | 36.7607 | 0.15 | 1.0 | 0.87 | 0.10 | 0.6 | 1.34 | 0.13 | 0.8 |

Supplementary Material (ESI) for Journal of Environmental Monitoring  
This journal is © The Royal Society of Chemistry 2011

|         |   |     |                |      |         |         |      |     |      |      |     |      |      |     |
|---------|---|-----|----------------|------|---------|---------|------|-----|------|------|-----|------|------|-----|
| Algeria | I | 119 | Orán           | 24.5 | -0.6110 | 35.7271 | 0.09 | 1.5 | 1.40 | 0.09 | 2.5 | 1.34 | 0.09 | 2.5 |
| Morocco | I | 120 | Nador          | 21.0 | -2.8393 | 35.2191 | 0.10 | 2.0 | 1.21 | 0.06 | 2.7 | 1.27 | 0.06 | 2.7 |
| Morocco | I | 121 | Mellila        | 21.5 | -2.9249 | 35.3091 | 0.10 | 1.6 | 1.05 | 0.08 | 0.7 | 1.09 | 0.08 | 0.7 |
| Morocco | I | 122 | Cap 3 fourches | 17.0 | -2.9469 | 35.4346 | 0.12 | 0.9 | 1.42 | 0.04 | 0.7 | 1.68 | 0.06 | 0.8 |
| Morocco | I | 123 | Ceuta          | 23.0 | -5.3333 | 35.9038 | 0.14 | 0.6 | 1.12 | 0.06 | 0.6 | 1.54 | 0.09 | 0.8 |

Note: the data obtained from Banco di Pantelleria [site No. 98] was included in the Tyrrhenian sub-basin for data treatments, despite this location may receive a direct influence of the Eastern Mediterranean basin.

Supplementary Material (ESI) for Journal of Environmental Monitoring  
This journal is © The Royal Society of Chemistry 2011



Figure S1. Condition Index (mean  $\pm$  95 % confidence interval) in caged mussels (*Mytilus galloprovincialis*) from the four sub-basins of the Western Mediterranean sea (N=123). Mussels were sampled in July after an immersion period of 12 weeks. Bars labelled with the same letter are not statistically different ( $p < 0.05$ ) tested by Kruskal Wallis test and Tanhane T2 pos-hoc test.

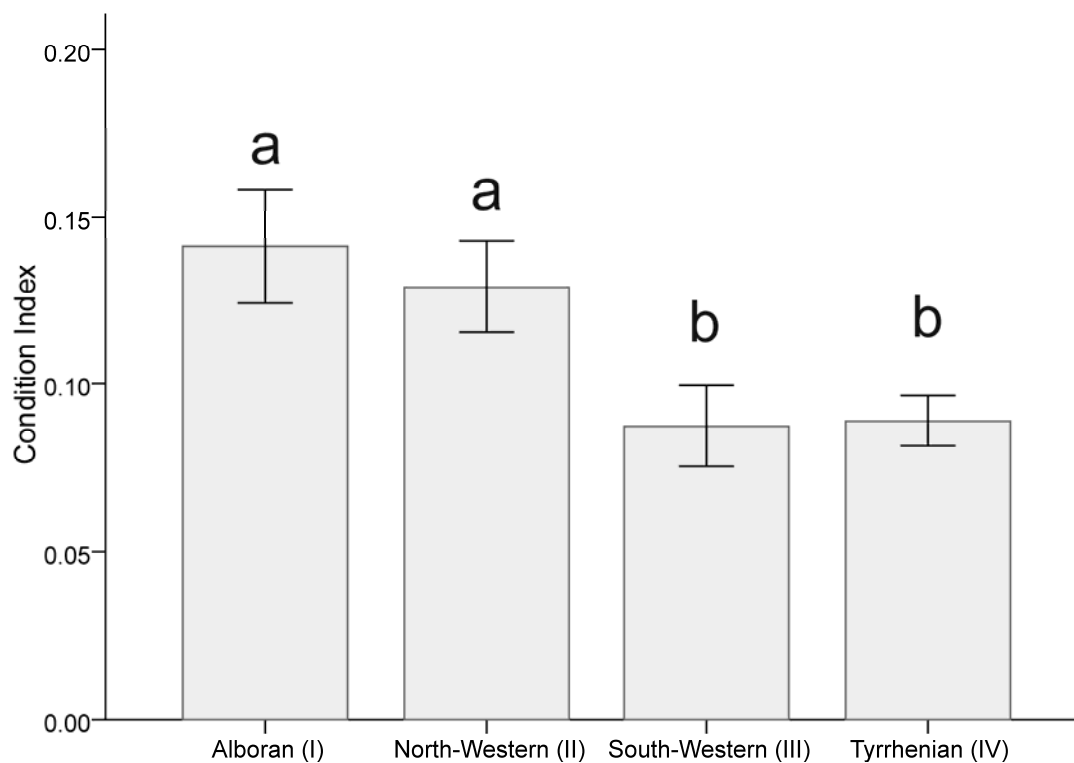

Figure S2. Plots showing the correlation between metal concentration and 1/CI for Pb, Cd, Hg and Ni datasets (including outlier values)

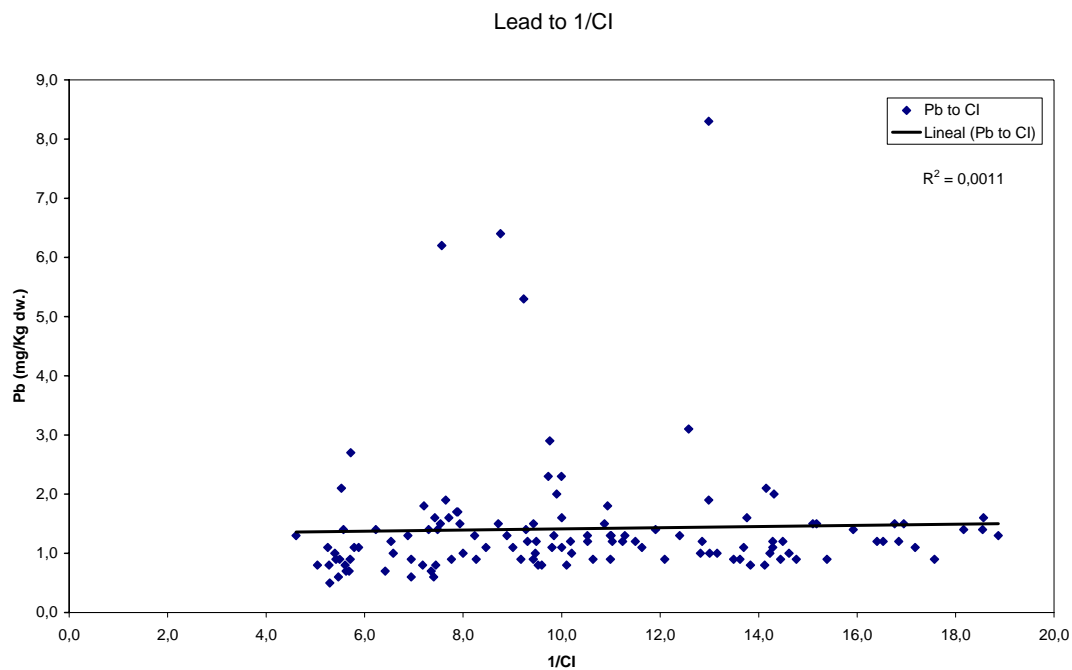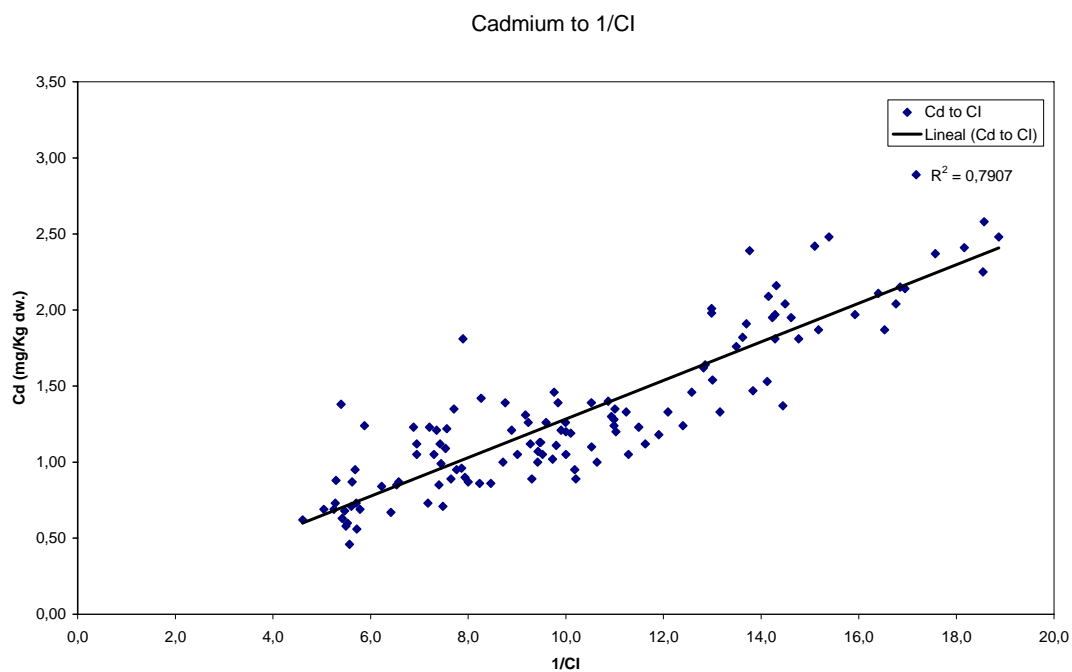

Mercury to 1/CI

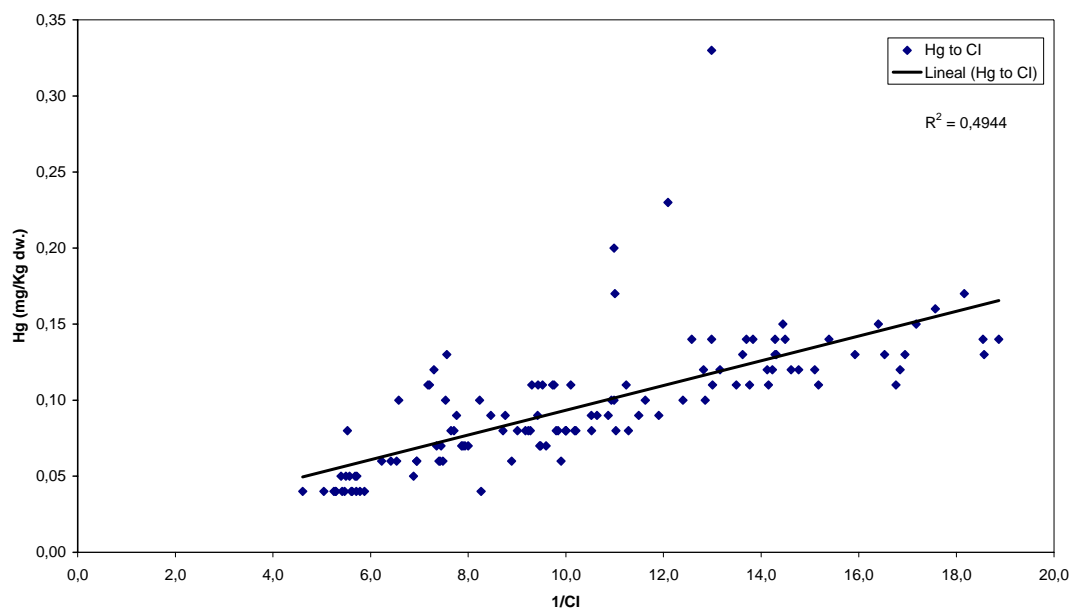

Nickel to 1/CI

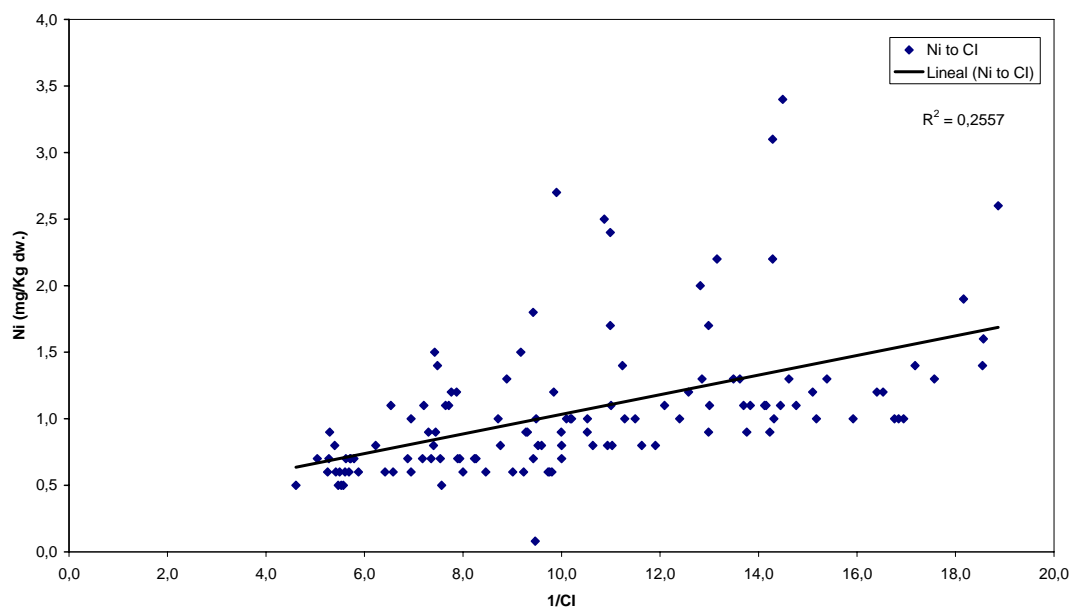

The linear regression models (LTS-Software), after removing the outliers, gave the following parameters (CI=condition index;  $R^2$ =regression coefficient;  $C_p$ =critical probability):

Lead:  $Pb = 0.021 * (1/CI) + 0.007$ ;  $R^2 = 6.57$ ;  $C_p = 0.01$

Cadmium:  $Cd = 0.124 * (1/CI) + 0.01$ ;  $R^2 = 84.65$ ;  $C_p < 0.0001$

Mercury:  $Hg = 0.008 * (1/CI) + 0.007$ ;  $R^2 = 81.71$ ;  $C_p = 0.0001$

Nickel:  $Ni = 0.049 * (1/CI) + 0.41$ ;  $R^2 = 50.25$ ;  $C_p < 0.0001$

Figure S3. Log-normal frequency distribution curves of adjusted metal concentrations (Cd, Hg and Ni) and Pb concentrations (mg/kg d.w.) in caged mussels (*Mytilus galloprovincialis*) immersed for a period of 12 weeks. Each datasets comprise values measured in the 123 sampling sites in the Western Mediterranean sea (2004, 2005 and 2006).

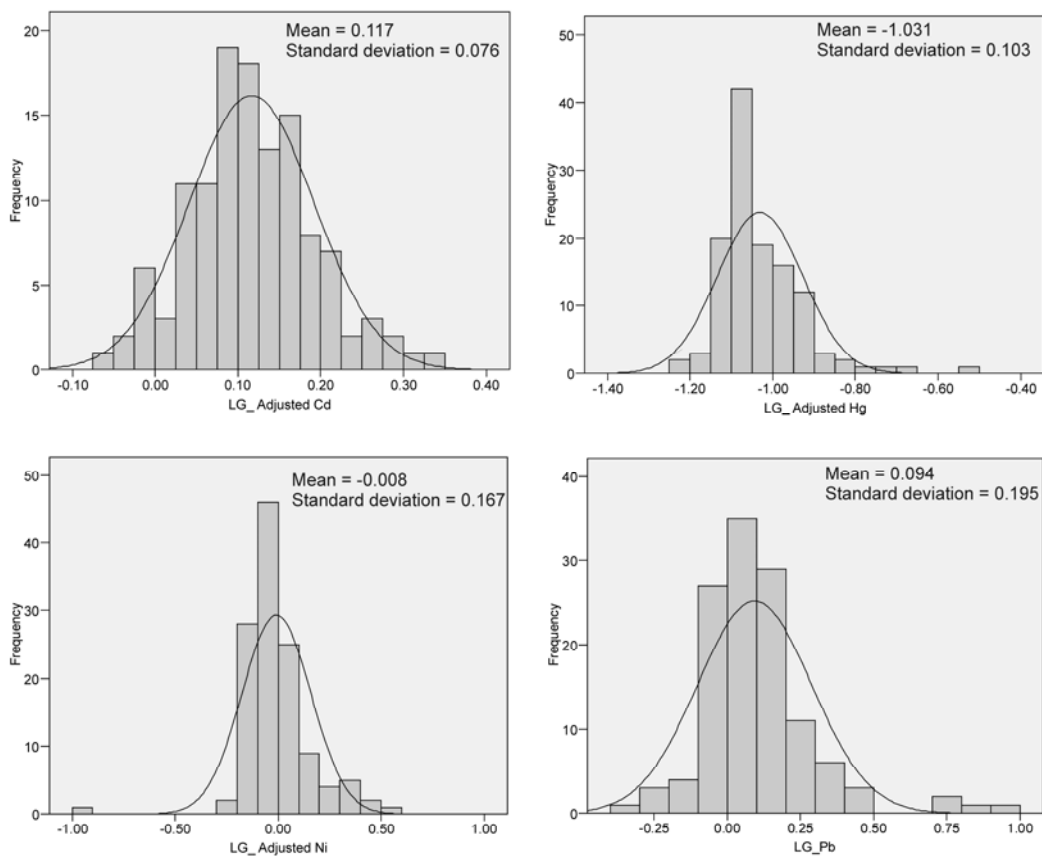

Supplement: c0em00725k.pdf [file c0em00725k.pdf]
